# Supplementary material for: Dopamine in critically ill patients with cardiac dysfunction: A systematic review with meta‐analysis and trial sequential analysis
Source: PubMed Central journal article supplement — Acta Anaesthesiol Scand. 2018 Dec 4;63(4):424–37. doi: 10.1111/aas.13294 (PMC6587868; doi:10.1111/aas.13294), 2018-12-04
Supplement: AAS-63-424-s001.pdf [file AAS-63-424-s001.pdf]

*SUPPLEMENTS 1: search strategy and additional tables and figures*

**Dopamine in critically ill patients with cardiac dysfunction: a systematic review with meta-analysis and trial sequential analysis**

Bart Hiemstra,<sup>1</sup> MD, Geert Koster,<sup>1</sup> MD, Jørn Wetterslev,<sup>2</sup> MD, PhD, Christian Gluud,<sup>2</sup> MD, Dr. Med.Sci., Janus C Jakobsen,<sup>2,3</sup> MD, PhD, Thomas WL Scheeren,<sup>4</sup> MD, PhD, Frederik Keus,<sup>1</sup> MD, PhD, Iwan CC van der Horst,<sup>1</sup> MD, PhD

<sup>1</sup> Department of Critical Care, University of Groningen, University Medical Center Groningen, The Netherlands

<sup>2</sup> The Copenhagen Trial Unit (CTU), Centre for Clinical Intervention Research, Copenhagen, Denmark

<sup>3</sup> Department of Cardiology, Holbæk Hospital, Denmark

<sup>4</sup> Department of Anaesthesiology, University of Groningen, University Medical Center Groningen, The Netherlands

**Table of contents**

|                                                                                                   |    |
|---------------------------------------------------------------------------------------------------|----|
| Search strategy .....                                                                             | 2  |
| Table S1: In- and exclusion criteria of trials included in the meta-analysis .....                | 5  |
| Table S2: Risk and odds ratios with TSA-adjusted confidence intervals (CI) for all outcomes ..... | 7  |
| Table S3. Reported harms in observational studies .....                                           | 8  |
| Figure S1: Explanation on how to interpret the Trial Sequential Analysis .....                    | 9  |
| Figure S2: Trial Sequential Analysis of serious adverse events .....                              | 10 |
| Figure S3: Forest plot of all-cause mortality in the post-hoc meta-analysis .....                 | 11 |
| Figure S4: Trial Sequential Analysis for all-cause mortality in the post-hoc meta-analysis .....  | 12 |
| Figure S5a: Manhattan matrix plot with beneficial outcomes .....                                  | 13 |
| Figure S5b: Manhattan matrix plot with harmful outcomes .....                                     | 14 |
| Figure S6: Funnel plots for small trial bias including publication bias .....                     | 15 |
| References .....                                                                                  | 17 |

## Search strategy

Last search conducted at: 19 April 2018

### PubMed (3007 hits)

("Dopamine"[Mesh] OR dopamine[tiab] OR dopamina[tiab] OR dopaminum[tiab] OR dophamine[tiab] OR dopastat[tiab] OR deoxyepinephrine [tiab] OR dynatra[tiab] OR intropin[tiab] OR hydroxytyramin\*[tiab] OR oxytyramin\*[tiab] OR revivan[tiab] OR 3,4-dihydroxyphenyl\*[tiab])

AND

("Intensive Care Units"[Mesh] OR "Critical Care"[Mesh] OR "Critical Illness"[Mesh] OR "Surgical Procedures, Operative"[Mesh] OR "Cardiovascular Diseases/surgery"[Mesh] OR "Mortality"[Mesh:NoExp] OR "Hospital Mortality"[Mesh] OR "Shock"[Mesh] OR "Hemodynamics"[Mesh] OR "Heart Failure"[Mesh] OR "Acute Kidney Injury"[Mesh] OR intensive care[tiab] OR ICU[tiab] OR critical care[tiab] OR coronary care[tiab] OR critically ill\*[tiab] OR hospital\*[tiab] OR surg\*[ti] OR cardiac surgery[tiab] OR mortality[tiab] OR shock[tiab] OR hemodynamic\*[tiab] OR haemodynamic\*[tiab] OR heart failure[tiab] OR kidney injury[tiab] OR renal failure[tiab] OR renal insufficiency[tiab])

AND

("Controlled Clinical Trials as Topic"[Mesh] OR "Comparative Study" [Publication Type] OR "Cohort Studies"[Mesh] OR "Treatment Outcome"[Mesh] OR "Drug Therapy, Combination"[Mesh] OR "Dopamine/therapeutic use"[Mesh] OR "Clinical Study" [Publication Type] OR "Drug Evaluation"[Mesh] OR randomi\*[tiab] OR randomly[tiab] OR trial[tiab] OR controls[tiab] OR control group[tiab] OR clinical study[tiab] OR controlled study[tiab] OR cohort[tiab] OR prospective[tiab] OR observational[tiab] OR (patients[tiab] AND (compared[tiab] OR comparison[tiab] OR versus[tiab])) OR (efficacy[tiab] AND safety[tiab]))

NOT

((("Animals"[Mesh] NOT "Humans"[Mesh]) OR (("Child"[Mesh] OR "Infant"[Mesh]) NOT "Adult"[Mesh]) OR "Parkinson Disease"[Majr] OR "Schizophrenia"[Majr] OR animal[ti] OR rat[ti] OR rats[ti] OR mouse[ti] OR mice[ti] OR child\*[ti] OR pediatr\*[ti] OR paediatr\*[ti] OR neonat\*[ti] OR newborn[ti] OR parkinson\*[ti] OR schizo\*[ti] OR "Case Reports" [Publication Type] OR "Comment" [Publication Type] OR "Editorial" [Publication Type] OR "Review" [Publication Type])

### Embase (4653 hits)

('dopamine'/exp OR (dopamine OR dopamina OR dopaminum OR dophamine OR dopastat OR deoxyepinephrine OR dynatra OR intropin OR hydroxytyramin\* OR oxytyramin\* OR revivan OR 3,4-dihydroxyphenyl\*):ab,ti)

AND

('intensive care'/exp OR 'coronary care unit'/exp OR 'critical illness'/exp OR 'surgery'/de OR 'cardiovascular surgery'/exp OR 'off pump surgery'/exp OR 'hospital admission'/exp OR 'mortality'/de OR 'shock'/exp OR 'hemodynamics'/exp OR 'heart disease'/exp OR 'kidney failure'/exp

OR

('intensive care' OR ICU OR 'critical care' OR 'critically ill\*' OR hospital\* OR 'cardiac surgery' OR shock OR hemodynamic\* OR haemodynamic\* OR 'kidney injury' OR 'renal failure' OR 'renal insufficiency' OR mortality):ab,ti OR surg\*:ti)

AND

('clinical trial (topic)'/exp OR 'clinical trial'/exp OR 'comparative study'/exp OR 'prospective study'/exp OR 'retrospective study'/exp OR 'cohort analysis'/exp OR 'drug combination'/exp OR 'drug

*comparison'/exp OR 'drug dose comparison'/exp OR (randomi\* OR randomly OR trial OR controls OR 'control group' OR 'clinical study' OR 'controlled study' OR cohort OR prospective OR observational):ab,ti OR (patients AND (compared OR comparison OR versus)):ab,ti OR (efficacy AND safety):ab,ti)*

NOT

*((('animal'/exp OR 'nonhuman'/exp) NOT 'human'/exp) OR ('child'/exp NOT 'adult'/exp) OR 'Parkinson disease'/exp/mj OR 'schizophrenia'/exp/mj OR (animal OR rat OR rats OR mouse OR mice OR child\* OR pediater\* OR paediatr\* OR neonat\* OR newborn OR parkinson\* OR schizophren\*):ti OR ('case report'/exp OR 'editorial'/exp OR 'review'/exp))*

*Cochrane central (1846 hits with filter: trials)*

*([mh dopamine] OR dopamine OR dopamina OR dopaminum OR dophamine OR dopastat OR deoxyepinephrine OR dynatra OR intropin OR hydroxytyramin\* OR oxytyramin\* OR revivan OR 3,4-dihydroxyphenyl\*)*

AND

*([mh ^"critical care"] OR [mh "critical illness"] OR [mh "Specialties, Surgical"] OR [mh hospitalization] OR [mh mortality] OR [mh shock] OR [mh hemodynamics] OR [mh "heart failure"] OR [mh "renal insufficiency"] OR "intensive care" OR ICU OR "critical care" OR "coronary care" OR "critically ill\*" OR hospital\* OR surgery OR mortality OR shock OR hemodynamic\* OR haemodynamic\* OR "heart failure" OR "kidney injury" OR "renal failure" OR "renal insufficiency")*

NOT

*(([mh animals] not [mh human]) OR (([mh Child] OR [mh Infant]) not [mh Adult]) OR (animal\* OR rat\* OR mouse OR mice OR child\* OR infant\* OR pediater\* OR paediatr\* OR neonat\* OR newborn OR parkinson\* OR schizo\*):ti)*

*ISI web of science (389 hits without PubMed database) (4652 with PubMed database)*

*TS=(dopamine OR dopamina OR dopaminum OR dophamine OR dopastat OR deoxyepinephrine OR dynatra OR intropin OR hydroxytyramin\* OR oxytyramin\* OR revivan OR 3,4-dihydroxyphenyl\*)*

AND

*(TS=("critical care" OR "critical illness\*" OR "critically ill\*" OR "intensive care" OR ICU OR "coronary care" OR surger\* OR surgic\*) OR TS=((coronary OR thoracic OR heart OR cardiac OR renal OR kidney) NEAR/10 acute) OR TS=(mortality OR shock OR hSemodynamic\*) OR TS=((kidney OR renal) NEAR/10 (injur\* OR failure OR function\* OR dysfunction\*)) OR TS=("heart failure" OR hospital\*) OR TI=(surg\*))*

AND

*(TS=(random\* OR "clinical study" OR "controlled study" OR "clinical trial" OR "controlled trial" OR "control group\*" OR "comparative study" OR cohort OR prospective OR observational OR "treatment outcome") OR TS=(patients AND (compared OR comparison OR versus)) OR TS=(efficacy AND safety) OR TI=trial\*)*

NOT

*TI=(child\* OR infant\* OR pSediater\* OR neonat\* OR newborn\* OR parkinson\* OR schizo\* OR animal\* OR rat OR rats OR mouse OR mice)*

*CINAHL (EBSCO) (907 hits)*

*(MH "dopamine " OR dopamine OR dopamina OR dopaminum OR dophamine OR dopastat OR deoxyepinephrine OR dynatra OR intropin OR hydroxytyramin\* OR oxytyramin\* OR revivan OR 3,4-dihydroxyphenyl\*)*

AND

((MH "Critical Care+" OR MH "Emergency Care+" OR MH "Acute Disease" OR MH "Critical Illness" OR MH "Emergency Patients" OR MH "Critically Ill Patients" OR MH "Surgical Patients" OR MH "Mortality" OR MH "Heart Diseases+/SU" OR MH "Intensive Care Units+" OR MH "Critical Care Nursing+" OR MH "Shock+" OR MH "Hemodynamics+" OR MH "Kidney Failure, Acute+" OR "critical care " OR "critical illness " OR "critically ill " OR "coronary care " OR "heart surg\*" OR "thoracic surg\*" OR "cardiac surg\*" OR mortality OR shock OR hemodynamic\* OR haemodynamic\* OR "kidney injury " OR "renal failure " OR "renal dysfunction" OR "renal funcion\*" OR "OR hospital\*") OR TI surg\*)

AND

((MH "Clinical Trials+") OR (random\* N3 trial\*) OR (random\* N3 stud\*) OR "randomized controlled " OR "randomised controlled" OR "treatment outcome" OR "drug evaluation" OR "drug therapy" OR "clinical study" OR "comparative study" OR cohort OR prospective OR observational OR (patients AND (compared OR comparison OR versus)) OR (efficacy AND safety)) OR TI trial\*)

NOT

(TI (child\* OR infant\* OR pediatr\* OR paediatr\* OR neonat\* OR newborn\* OR parkinson\* OR schizo\* OR animal\* OR rat OR rats Or mouse OR mice))

**Table S1: In- and exclusion criteria of trials included in the meta-analysis**

| Trial, year                | Inclusion criteria                                                                                                                                                                                                                                                                                                                                                                                                                                                                                                                                                                          | Exclusion criteria                                                                                                                                                                                                                                                                                                                                                                                                                                                                                                                                                                                                                                                                                                                                                                                                                                                                              |
|----------------------------|---------------------------------------------------------------------------------------------------------------------------------------------------------------------------------------------------------------------------------------------------------------------------------------------------------------------------------------------------------------------------------------------------------------------------------------------------------------------------------------------------------------------------------------------------------------------------------------------|-------------------------------------------------------------------------------------------------------------------------------------------------------------------------------------------------------------------------------------------------------------------------------------------------------------------------------------------------------------------------------------------------------------------------------------------------------------------------------------------------------------------------------------------------------------------------------------------------------------------------------------------------------------------------------------------------------------------------------------------------------------------------------------------------------------------------------------------------------------------------------------------------|
| <b>Acute heart failure</b> |                                                                                                                                                                                                                                                                                                                                                                                                                                                                                                                                                                                             |                                                                                                                                                                                                                                                                                                                                                                                                                                                                                                                                                                                                                                                                                                                                                                                                                                                                                                 |
| Kamiya [1]<br>2015         | <ul style="list-style-type: none"> <li>NYHA class III–IV</li> </ul>                                                                                                                                                                                                                                                                                                                                                                                                                                                                                                                         | <ul style="list-style-type: none"> <li>Age &lt;20 years or &gt;85 years</li> <li>Systolic blood pressure &lt;90 mmHg</li> <li>Severe liver injury (ASAT/ALAT &gt;100 IU/L)</li> <li>Severe renal failure (creatinine &gt;2.0 mg/dL)</li> <li>Acute myocardial infarction within 3 months</li> <li>Received or anticipated need for IV vasoactive treatment or ultrafiltration therapy for HF</li> </ul>                                                                                                                                                                                                                                                                                                                                                                                                                                                                                         |
| Chen [4]<br>2013           | <ul style="list-style-type: none"> <li>Age ≥18 years</li> <li>Prior clinical diagnosis of HF</li> <li>Enrolled &lt;24 hours of hospital admission</li> <li>Anticipated hospitalization of ≥72 hours</li> <li>At least one symptom (dyspnoea, orthopnoea, or oedema) and one sign (rales on auscultation, peripheral oedema, ascites, pulmonary vascular congestion on chest radiography)</li> <li>Estimated GFR &gt;15 but &lt;60 mL/min/1.73 m<sup>2</sup></li> <li>Ability to have a PICC or central line placed &lt;12 hours of randomization and study drug infusion started</li> </ul> | <ul style="list-style-type: none"> <li>Systolic blood pressure &lt;90 mmHg</li> <li>Haemoglobin &lt;9 g/dL (&lt;5.6 mmol/L)</li> <li>Renal replacement therapy</li> <li>History of renal artery stenosis &gt;50%</li> <li>Haemodynamically significant arrhythmias &lt;4 weeks</li> <li>Acute coronary syndrome &lt;4 weeks</li> <li>HF secondary to: active myocarditis, hypertrophic obstructive cardiomyopathy, greater than moderate stenotic valvular disease, restrictive or constrictive cardiomyopathy, complex congenital heart disease, constrictive pericarditis</li> <li>Non-cardiac pulmonary oedema</li> <li>Clinical evidence of digoxin toxicity</li> <li>Need for mechanical hemodynamic support</li> <li>Sepsis</li> <li>Terminal illness with expected survival of &lt;1 year</li> <li>Pregnancy or nursing mothers</li> <li>Anticipated need for IV contrast use</li> </ul> |
| Varriale [10]<br>1997      | <ul style="list-style-type: none"> <li>Severe chronic CHF (NYHA class III or IV)</li> <li><i>Depressed left ventricular function</i></li> <li>Etiologically related to coronary artery disease or idiopathic dilated cardiomyopathy</li> <li>Signs of advanced pulmonary and systemic oedema</li> <li>Chemical markers of renal impairment: urea nitrogen ≥25 mg/dL and creatinine ≥1.5 mg/dL.</li> </ul>                                                                                                                                                                                   | <ul style="list-style-type: none"> <li>Systolic blood pressure &lt;100 mmHg</li> <li>Oliguria</li> <li>Serum creatinine &gt;2.9 mg/dL</li> <li>Serum potassium &lt;3.0 mmol/dL</li> <li>Haematocrit &lt;30%</li> </ul>                                                                                                                                                                                                                                                                                                                                                                                                                                                                                                                                                                                                                                                                          |
| Shah [2]<br>2014           | <ul style="list-style-type: none"> <li>Age ≥18 years</li> <li>HF and on daily use of oral loop diuretic &gt; 1 month</li> <li>Enrolled &lt;24h of hospital admission</li> <li>At least one symptom (dyspnoea, orthopnoea, or oedema) and one sign (rales on auscultation, peripheral oedema, ascites) or pulmonary vascular congestion on chest radiography</li> <li>Anticipated need for IV loop diuretics for ≥48 h</li> </ul>                                                                                                                                                            | <ul style="list-style-type: none"> <li>Systolic blood pressure &lt;90 mmHg</li> <li>Serum creatinine &gt;3.0 mg/dL or renal replacement therapy</li> <li>Anticipated need for IV contrast use</li> </ul>                                                                                                                                                                                                                                                                                                                                                                                                                                                                                                                                                                                                                                                                                        |
| Arutiunov [6]<br>2010      | <ul style="list-style-type: none"> <li>Age &gt;18 years</li> <li>Decompensated congestive HF with an ischemic origin</li> <li>Sinus rhythm or persistent tachycardia at rest</li> <li>Pulmonary artery wedge pressure &gt;20 mmHg</li> <li>Cardiac index &lt;2.6 L/min/m<sup>2</sup></li> <li>LVEF &lt;35%</li> <li>Systolic blood pressure &gt;85 mmHg</li> <li>Serum creatinine &lt;200 µmol/L</li> </ul>                                                                                                                                                                                 | <ul style="list-style-type: none"> <li>Systolic blood pressure &lt;85 mmHg)</li> <li>Creatinine &gt;200 µmol/L, GFR &lt;30 ml/min</li> <li>Acute coronary syndrome &lt;2 months</li> <li>Rheumatic valvular heart disease</li> <li>Chronic obstructive pulmonary disease</li> <li>Obstructive or restrictive cardiomyopathy</li> <li>Mobitz II or III atrioventricular blockade without pacemaker</li> <li>Arrhythmia or atrial flutter</li> <li>Heart rate &lt;40 beats/minute</li> <li>Pregnancy or period of breastfeeding</li> <li>Acute cerebrovascular accident &lt;6 months</li> <li>Regular intake of β-blockers</li> </ul>                                                                                                                                                                                                                                                             |
| Hsueh [7]<br>1998          | <ul style="list-style-type: none"> <li>HF of NYHA class III or IV;</li> <li>Previously untreated HF or had stopped medications by personal decision for &gt;2 weeks</li> <li>LVEF ≤45%</li> </ul>                                                                                                                                                                                                                                                                                                                                                                                           | <ul style="list-style-type: none"> <li>Active myocarditis</li> <li>Thyroid disease</li> <li>Severe hypertension</li> <li>Atrial flutter-fibrillation</li> <li>High-degree atrioventricular block</li> <li>Pacemaker therapy</li> <li>Chronic obstructive lung disease</li> <li>Severe hepatic or renal disease</li> </ul>                                                                                                                                                                                                                                                                                                                                                                                                                                                                                                                                                                       |

|                          |                                                                                                                                                                                                                                                                                                                                                                                                                                                                                           |                                                                                                                                                                                                                                                                                                                                                                                                                        |
|--------------------------|-------------------------------------------------------------------------------------------------------------------------------------------------------------------------------------------------------------------------------------------------------------------------------------------------------------------------------------------------------------------------------------------------------------------------------------------------------------------------------------------|------------------------------------------------------------------------------------------------------------------------------------------------------------------------------------------------------------------------------------------------------------------------------------------------------------------------------------------------------------------------------------------------------------------------|
| Cotter [9]<br>1997       | <ul style="list-style-type: none"> <li>Hospitalised because of congestive HF</li> </ul>                                                                                                                                                                                                                                                                                                                                                                                                   | <ul style="list-style-type: none"> <li>Diabetes mellitus</li> <li>Severe renal failure (serum creatinine &gt;200 µmol/L or creatinine clearance &lt;30 ml/min)</li> <li>Systolic blood pressure ≤110 mm Hg</li> <li>Severe valvular disease</li> <li>LVEF &gt;40%</li> </ul>                                                                                                                                           |
| Giamouzis [5]<br>2010    | <ul style="list-style-type: none"> <li>Age &gt;18 years</li> <li>History of HF</li> <li>Oxygen saturation &lt;90% on admission</li> <li>Deterioration of HF symptoms &lt;6 hours: dyspnoea at rest, orthopnoea, and paroxysmal nocturnal dyspnoea, accompanied by signs of congestion (3<sup>rd</sup> heart sound, jugular venous distension, pulmonary rales)</li> <li>B-type natriuretic peptide &gt;400 pg/mL or NT-proBNP &gt;1500 pg/mL</li> </ul>                                   | <ul style="list-style-type: none"> <li>Acute de novo HF</li> <li>Systolic blood pressure &lt;90 mmHg</li> <li>Severe renal failure (admission creatinine &gt;215 mmol/L or estimated GFR &gt;30 mL/min/1.73 m<sup>2</sup>)</li> <li>Severe valvular disease</li> <li>HF secondary to congenital heart disease</li> <li>Scheduled cardiac surgery &lt;2 months</li> <li>Anticipated need for IV contrast use</li> </ul> |
| Tripodkiadis [3]<br>2014 | <ul style="list-style-type: none"> <li>Age &gt;18 years</li> <li>History of HF</li> <li>Dyspnoea on minimal exertion or rest dyspnoea and oxygen saturation &lt;90% on admission</li> <li>At least one or more: signs of congestion (3<sup>rd</sup> heart sound or pulmonary rales &gt;½ or lower extremity/ sacral oedema &gt;1+), interstitial congestion or pleural effusion on chest radiography, and B-type natriuretic peptide &gt;400 pg/mL or NT-proBNP &gt;1500 pg/mL</li> </ul> | <ul style="list-style-type: none"> <li>Creatinine &gt;200 µmol/L or GFR &gt;30 mL/min/1.73 m<sup>2</sup></li> <li>Systolic blood pressure &lt;90 mmHg</li> <li>Severe valvular disease</li> <li>HF secondary to complex congenital heart disease</li> <li>Suspected or confirmed acute coronary syndrome</li> <li>Scheduled cardiac surgery &lt;6 months</li> <li>Anticipated need for IV contrast use</li> </ul>      |
| Sindone [8]<br>1998      | <ul style="list-style-type: none"> <li>HF of NYHA class IV</li> </ul>                                                                                                                                                                                                                                                                                                                                                                                                                     | <ul style="list-style-type: none"> <li>Not described (abstract only)</li> </ul>                                                                                                                                                                                                                                                                                                                                        |

### Cardiac surgery

|                        |                                                                                                                                                                                                                                                                                                                            |                                                                                                                                                                                                                                                                                              |
|------------------------|----------------------------------------------------------------------------------------------------------------------------------------------------------------------------------------------------------------------------------------------------------------------------------------------------------------------------|----------------------------------------------------------------------------------------------------------------------------------------------------------------------------------------------------------------------------------------------------------------------------------------------|
| Sirivella [14]<br>2000 | <ul style="list-style-type: none"> <li>Manifested with either acute oliguric or anuric renal failure in the postoperative period</li> <li>Adequate cardiac output and tissue perfusion</li> </ul>                                                                                                                          | <ul style="list-style-type: none"> <li>Acute renal failure associated with inadequate cardiac output and tissue perfusion</li> <li>Preoperative renal replacement therapy</li> </ul>                                                                                                         |
| Costa [12]<br>1990     | <ul style="list-style-type: none"> <li>Cardiac surgery requiring cardiopulmonary bypass</li> <li>Preoperative renal dysfunction: creatinine clearance ≤50 mL/min</li> </ul>                                                                                                                                                | <ul style="list-style-type: none"> <li>Usage of enflurane</li> <li>Usage of diuretics</li> </ul>                                                                                                                                                                                             |
| Bove [13]<br>2005      | <ul style="list-style-type: none"> <li>Age &gt;18 years</li> <li>Continuous Improvement in Cardiac Surgery Program (CICSP) score &gt;10</li> </ul>                                                                                                                                                                         | <ul style="list-style-type: none"> <li>Emergent procedure</li> <li>Pre-operative renal replacement therapy</li> <li>Glaucoma</li> </ul>                                                                                                                                                      |
| Rosseeel [15]<br>1997  | <ul style="list-style-type: none"> <li>Elective CABG</li> <li>Low cardiac output syndrome, defined as a CI &lt;2.2 L/min/m<sup>2</sup> in the absence of hypovolaemia (central venous pressure ≥8 mmHg and/or pulmonary capillary wedge pressure ≥12 mmHg and/or diastolic pulmonary artery pressure ≥12 mm Hg)</li> </ul> | <ul style="list-style-type: none"> <li>Age &gt;75 years</li> <li>Preoperative renal dysfunction (serum creatinine &gt; 200 mmol/L)</li> <li>Liver dysfunction (g-GT &gt;20% above normal)</li> <li>Pheochromocytoma</li> <li>With monoamine oxidase inhibitors</li> <li>Pregnancy</li> </ul> |
| Hausen [17]<br>1992    | <ul style="list-style-type: none"> <li>Age &gt;18 years</li> <li>Mitral valve operation</li> <li>Mitral valve disease</li> <li>CI &lt;2.5 L/min/m<sup>2</sup> pre-operatively at rest</li> </ul>                                                                                                                           | <ul style="list-style-type: none"> <li>Revascularization procedures</li> <li>Aortic valve operations</li> </ul>                                                                                                                                                                              |
| Oppizzi [11]<br>1997   | <ul style="list-style-type: none"> <li>Severe left ventricular dysfunction (LVEF &lt;35%)</li> <li>Requiring CABG</li> </ul>                                                                                                                                                                                               | <ul style="list-style-type: none"> <li>The need for an associated intervention during cardiac surgery</li> </ul>                                                                                                                                                                             |
| Tarr [16]<br>1993      | <ul style="list-style-type: none"> <li>Mitral valve surgery from the time of weaning from cardiopulmonary bypass</li> </ul>                                                                                                                                                                                                | <ul style="list-style-type: none"> <li>Failure of drug measured by hemodynamic parameters and the patient's clinical condition</li> </ul>                                                                                                                                                    |

Trials are sorted by setting and dose administered. \* The timing of starting the experimental administration differed between these two treatment arms. Abbreviations: AHF, acute heart failure; LVEF, left-ventricular ejection fraction; CABG, coronary artery bypass grafting; CI, cardiac index; GFR, glomerular filtration rate; HF, heart failure; LVEF, left ventricular ejection fraction; NYHA, New York health association.

**Table S2: Risk and odds ratios with TSA-adjusted confidence intervals (CI) for all outcomes, stratified by intervention**

|                                     | Main meta-analysis:<br>>50% patients had cardiac dysfunction |                 |                           | Sensitivity analysis:<br>Only patients with cardiac dysfunction |                 |                           | Post-hoc meta-analysis:<br>>25% patients had cardiac dysfunction |                 |                                                   |
|-------------------------------------|--------------------------------------------------------------|-----------------|---------------------------|-----------------------------------------------------------------|-----------------|---------------------------|------------------------------------------------------------------|-----------------|---------------------------------------------------|
|                                     | <i>Trials</i>                                                | <i>Patients</i> | <i>RR or OR (95% CI)*</i> | <i>Trials</i>                                                   | <i>Patients</i> | <i>RR or OR (95% CI)*</i> | <i>Trials</i>                                                    | <i>Patients</i> | <i>RR or OR (95% &amp; TSA-adjusted CI)*</i>      |
| <b>Mortality</b>                    |                                                              |                 |                           |                                                                 |                 |                           |                                                                  |                 |                                                   |
| Placebo or control                  | 5                                                            | 452             | 0.93 (0.63 to 1.38)       | 1                                                               | 20              | -                         | 15                                                               | 954             | 0.89 (0.62 to 1.28)                               |
| Potentially active control          | 12                                                           | 586             | 0.90 (0.14 to 5.84)       | 6                                                               | 252             | 0.94 (0.35 to 2.54)       | 28                                                               | 3017            | 1.08 (1.00 to 1.17) ; (0.95 to 1.23)              |
| Any comparator                      | 15                                                           | 1038            | 0.92 (0.68 to 1.23)       | 7                                                               | 272             | 0.94 (0.35 to 2.54)       | 36                                                               | 3971            | 1.07 (0.99 to 1.16) ; (0.95 to 1.20)              |
| <b>Serious adverse events</b>       |                                                              |                 |                           |                                                                 |                 |                           |                                                                  |                 |                                                   |
| Placebo or control                  | 2                                                            | 324             | 1.48 (0.82 to 2.67)       | 0                                                               | 0               | -                         | 4                                                                | 473             | 1.44 (0.90 to 2.29)                               |
| Potentially active control          | 5                                                            | 258             | 1.12 (0.84 to 1.50)       | 2                                                               | 96              | 1.45 (0.43 to 4.90)       | 8                                                                | 388             | 1.55 (0.94 to 2.54)                               |
| Any comparator                      | 6                                                            | 582             | 1.18 (0.91 to 1.53)       | 2                                                               | 96              | 1.45 (0.43 to 4.90)       | 11                                                               | 861             | 1.44 (1.03 to 2.00)                               |
| <b>Myocardial infarction</b>        |                                                              |                 |                           |                                                                 |                 |                           |                                                                  |                 |                                                   |
| Placebo or control                  | 1                                                            | 83              | 2.00 (0.06 to 62.15)      | 0                                                               | 0               | -                         | 4                                                                | 240             | 2.01 (0.12 to 32.78)                              |
| Potentially active control          | 5                                                            | 256             | 1.21 (0.35 to 4.20)       | 3                                                               | 137             | 1.68 (0.15 to 18.75)      | 10                                                               | 2062            | 0.80 (0.46 to 1.37)                               |
| Any comparator                      | 5                                                            | 339             | 1.32 (0.42 to 4.09)       | 3                                                               | 137             | 1.68 (0.15 to 18.75)      | 11                                                               | 2302            | 0.82 (0.48 to 1.40)                               |
| <b>Ventricular tachyarrhythmias</b> |                                                              |                 |                           |                                                                 |                 |                           |                                                                  |                 |                                                   |
| Placebo or control                  | 3                                                            | 329             | 3.49 (0.71 to 17.11)      | 1                                                               | 20              | -                         | 6                                                                | 463             | 3.52 (0.72 to 17.20)                              |
| Potentially active control          | 6                                                            | 209             | 1.94 (0.40 to 9.32)       | 3                                                               | 66              | 0.76 (0.11 to 5.08)       | 10                                                               | 1953            | 1.89 (1.10 to 3.24)                               |
| Any comparator                      | 8                                                            | 538             | 2.59 (0.85 to 7.91)       | 4                                                               | 86              | 0.76 (0.11 to 5.08)       | 14                                                               | 2416            | 2.15 (1.32 to 3.50)                               |
| <b>Renal replacement therapy</b>    |                                                              |                 |                           |                                                                 |                 |                           |                                                                  |                 |                                                   |
| Placebo or control                  | 2                                                            | 113             | 1.00 (0.03 to 29.03)      | 0                                                               | 0               | -                         | 9                                                                | 493             | 0.46 (0.05 to 4.61)                               |
| Potentially active control          | 3                                                            | 258             | 0.42 (0.05 to 3.58)       | 0                                                               | 0               | -                         | 9                                                                | 2230            | 0.56 (0.17 to 1.87)                               |
| Any comparator                      | 4                                                            | 371             | 0.40 (0.06 to 2.85)       | 0                                                               | 0               | -                         | 15                                                               | 2723            | 0.54 (0.23 to 1.27)                               |
| <b>Atrial tachyarrhythmias</b>      |                                                              |                 |                           |                                                                 |                 |                           |                                                                  |                 |                                                   |
| Placebo or control                  | 2                                                            | 103             | 1.00 (0.03 to 29.04)      | 1                                                               | 20              | -                         | 5                                                                | 237             | 0.67 (0.41 to 1.10) <sup>#</sup>                  |
| Potentially active control          | 1                                                            | 78              | 1.81 (0.06 to 50.77)      | 0                                                               | 0               | -                         | 3                                                                | 1757            | 1.87 (1.48 to 2.36) <sup>#</sup> ; (0.72 to 4.87) |
| Any comparator                      | 2                                                            | 181             | 1.68 (0.10 to 27.22)      | 1                                                               | 20              | -                         | 6                                                                | 2009            | 1.00 (0.47 to 2.13)                               |

\*We only displayed TSA-adjusted CIs if the diversity adjusted required information size was more than 5% with a relative risk reduction of 10%,  $\alpha$  of 5%, and  $\beta$  of 10%. <sup>#</sup>There was a significant test of interaction between placebo or inactive control and potentially active control (P = 0.001). Abbreviations: RR, relative risk; OR, odds ratio; CI, confidence interval; TSA, trial-sequential analysis.

**Table S3. Reported harms in observational studies**

|                                     | <b>Studies</b> | <b>Patients</b> | <b>Events</b> | <b>Odds ratio</b> | <b>95% CI</b> |
|-------------------------------------|----------------|-----------------|---------------|-------------------|---------------|
| <b>Serious adverse events</b>       | 1              | 30              | 7             | 1.33              | 0.36 to 4.97  |
| <b>Myocardial infarction</b>        | 1              | 1758            | 42            | 0.67              | 0.36 to 1.26  |
| <b>Ventricular tachyarrhythmias</b> | 1              | 30              | 7             | 3.25              | 0.52 to 20.4  |
| <b>Renal replacement therapy</b>    | 1              | 1758            | 24            | 2.02              | 0.86 to 4.74  |
| <b>Atrial tachyarrhythmias</b>      | 0              | -               | -             | -                 | -             |

Abbreviations: CI, confidence interval.



**Figure S1: Explanation on how to interpret the Trial Sequential Analysis**

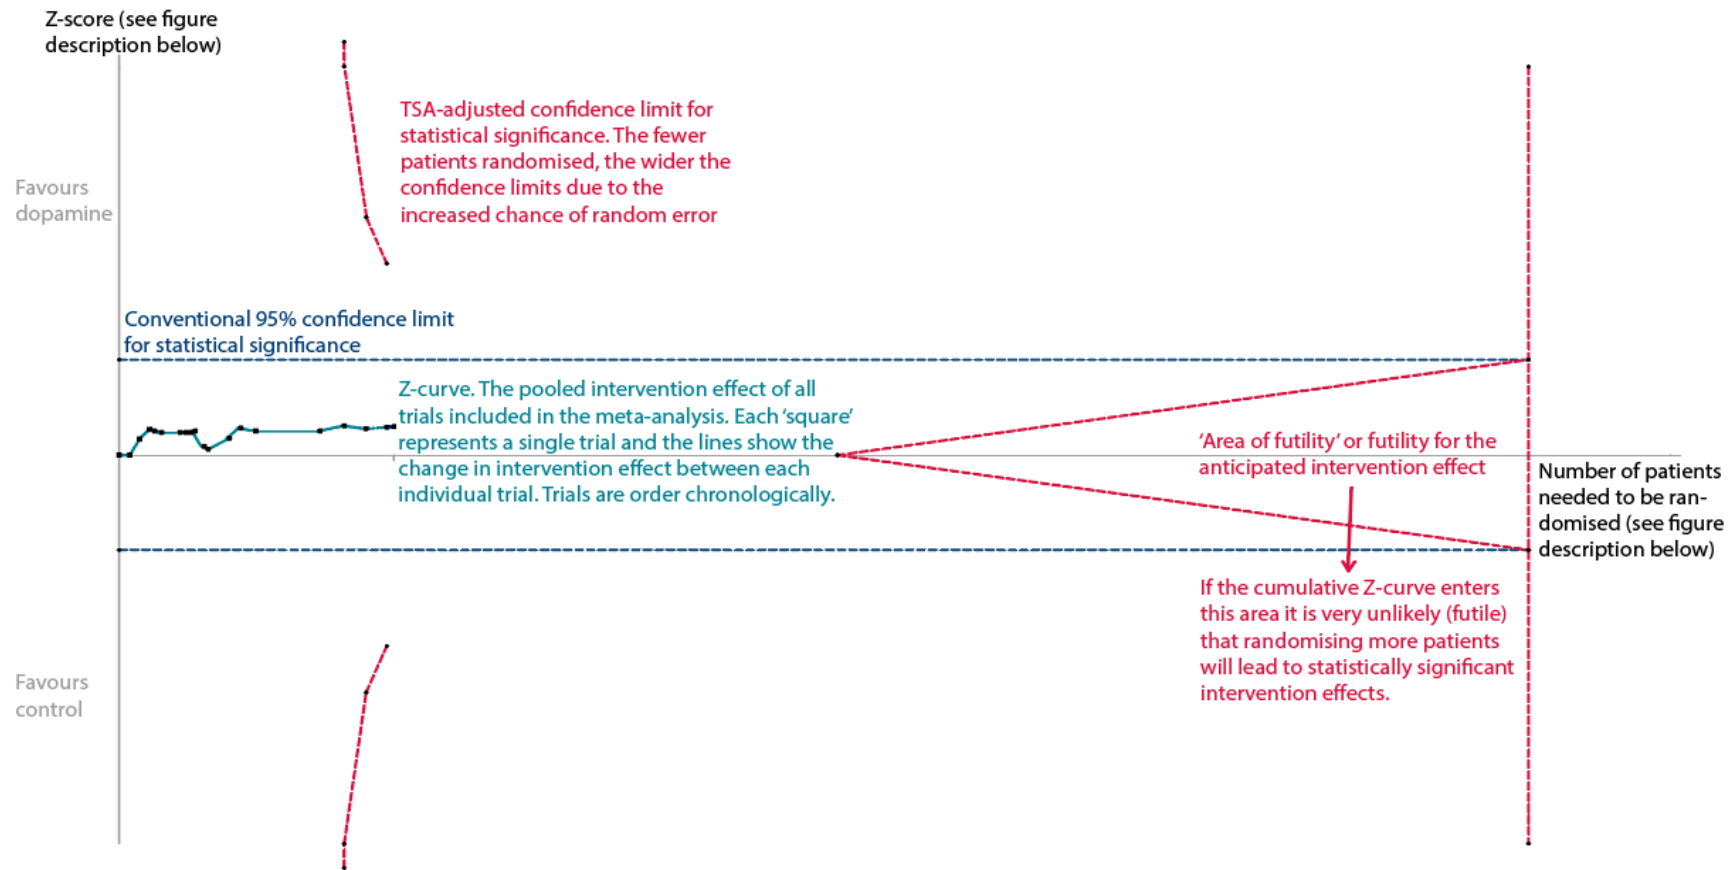

The y-axis displays the cumulative Z-score, which indicates the number of standard deviations the Z-curve is from the mean (in this case: relative risk of 1.0). A standard deviation or Z-score of 1.96 from the mean corresponds to an  $\alpha$  of 0.05. The x-axis displays the number of patients that need to be randomised before a definite conclusion can be made. The calculation of this number is comparable to a sample size calculation for a randomised clinical trial. The TSA graph displays whether there is sufficient evidence to reach a conclusion: this occurs when the cumulative Z-score crosses the TSA-adjusted confidence limits or enters the futility area (i.e. one of the red-dashed lines).

## Figure S2: Trial Sequential Analysis of serious adverse events

The TSA is based on seven trials, which is the meta-analysed effect of dopamine versus any (in)active comparator intervention.

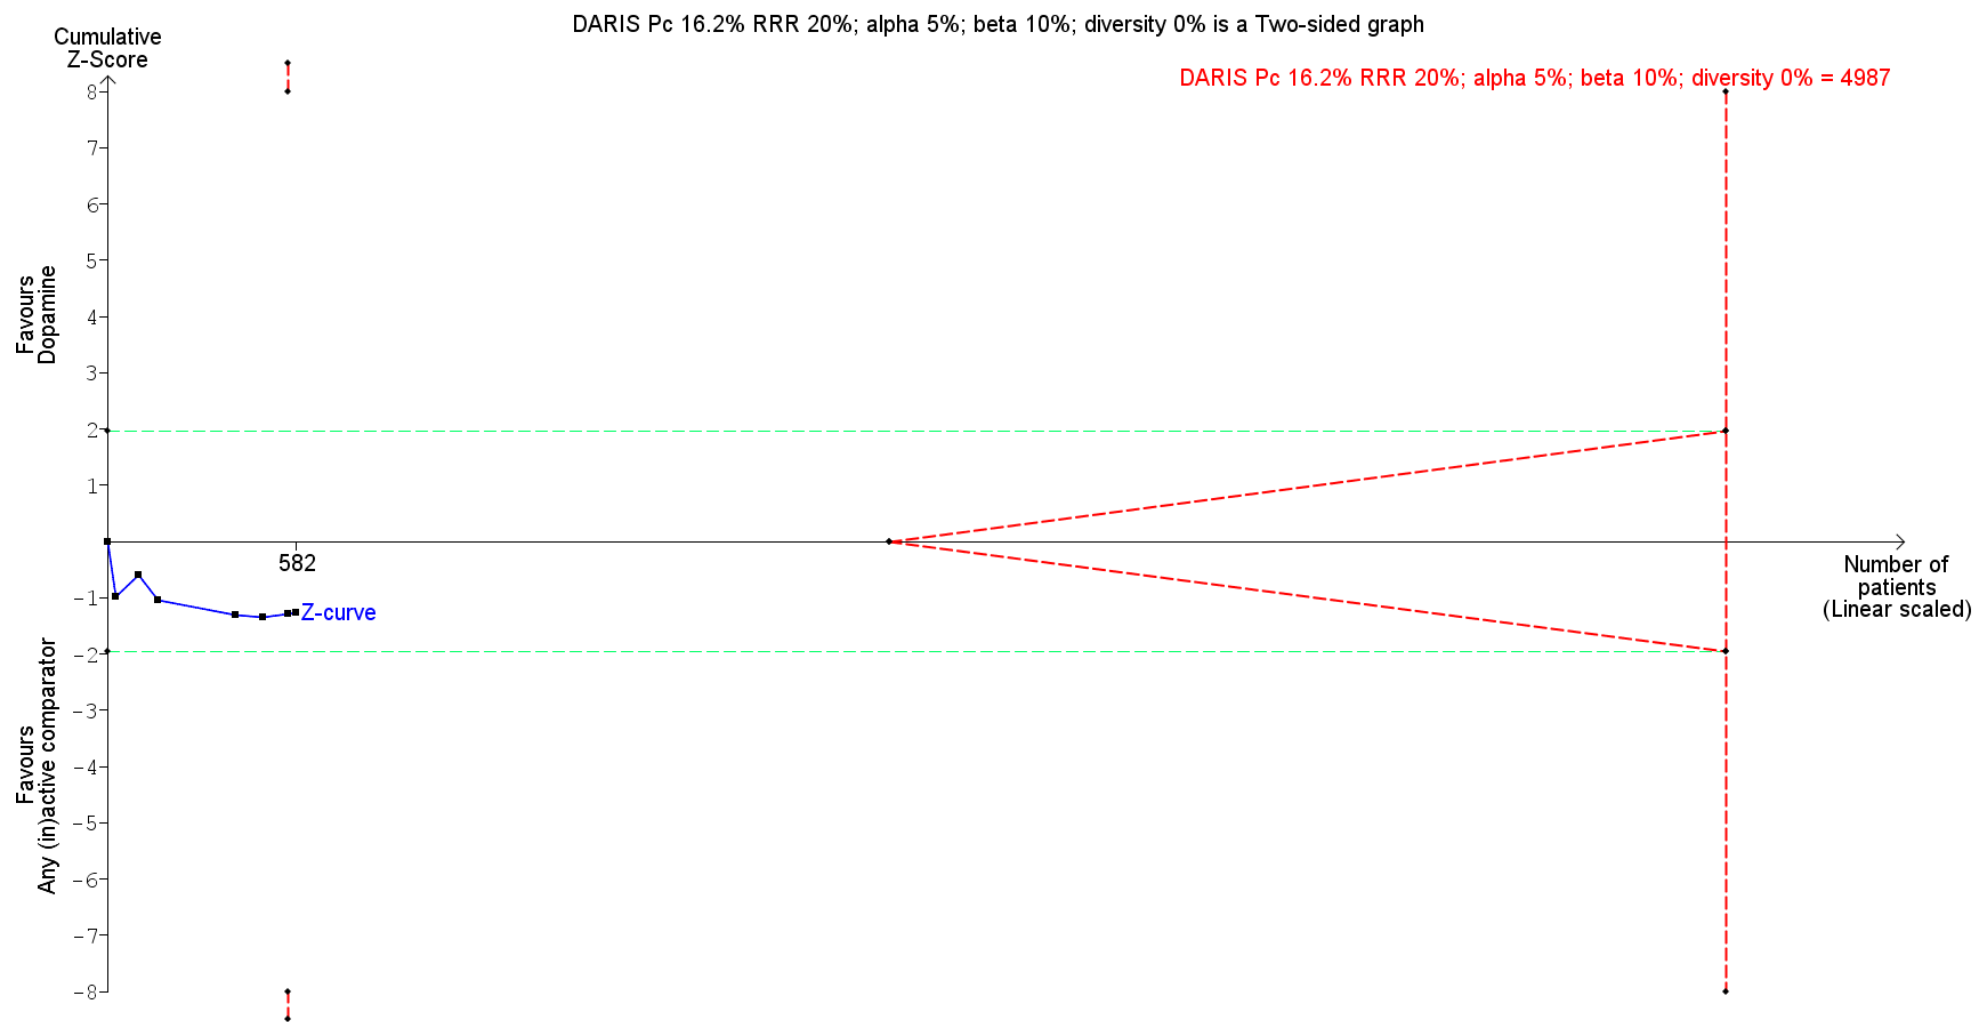

**Figure S3: Forest plot of all-cause mortality in the post-hoc meta-analysis**

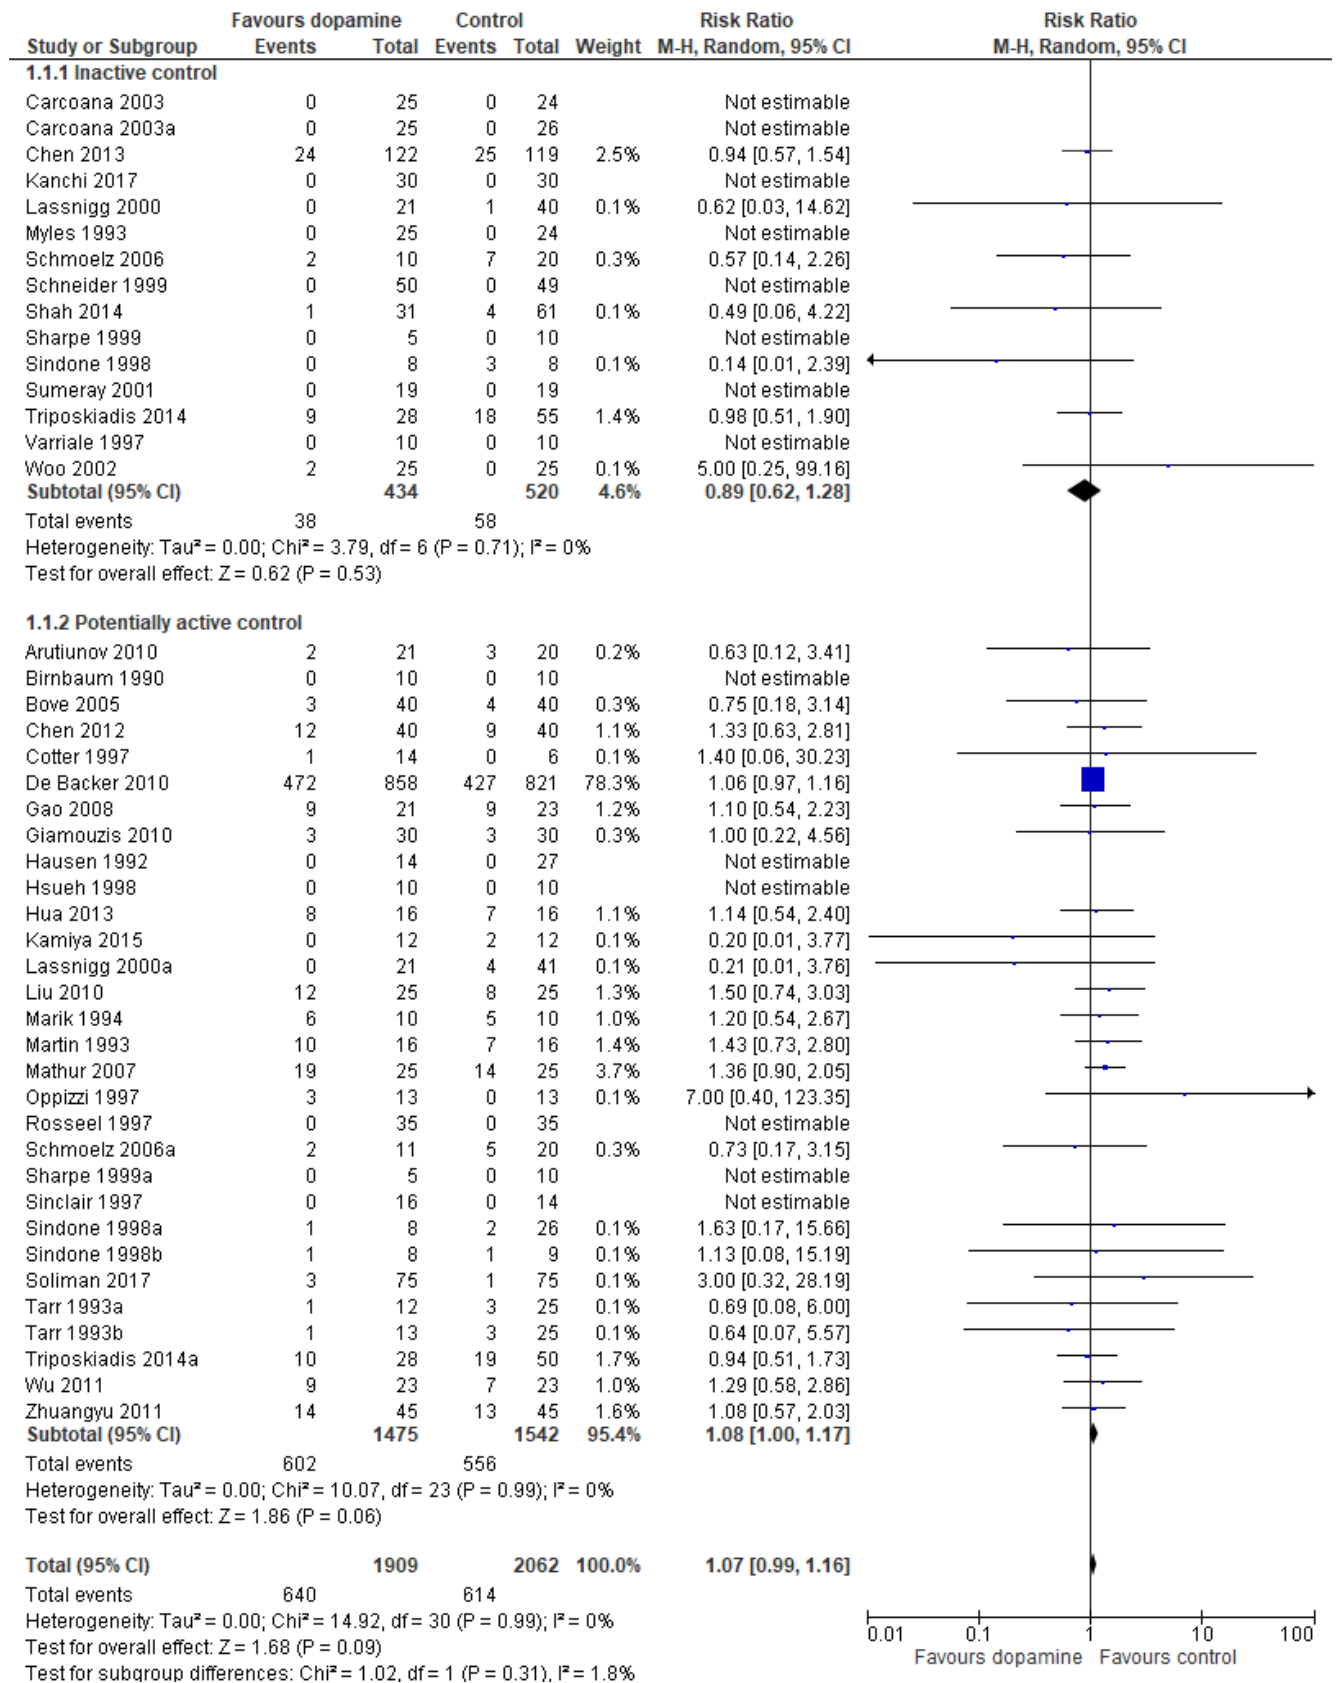

**Figure S4: Trial Sequential Analysis for all-cause mortality in the post-hoc meta-analysis**

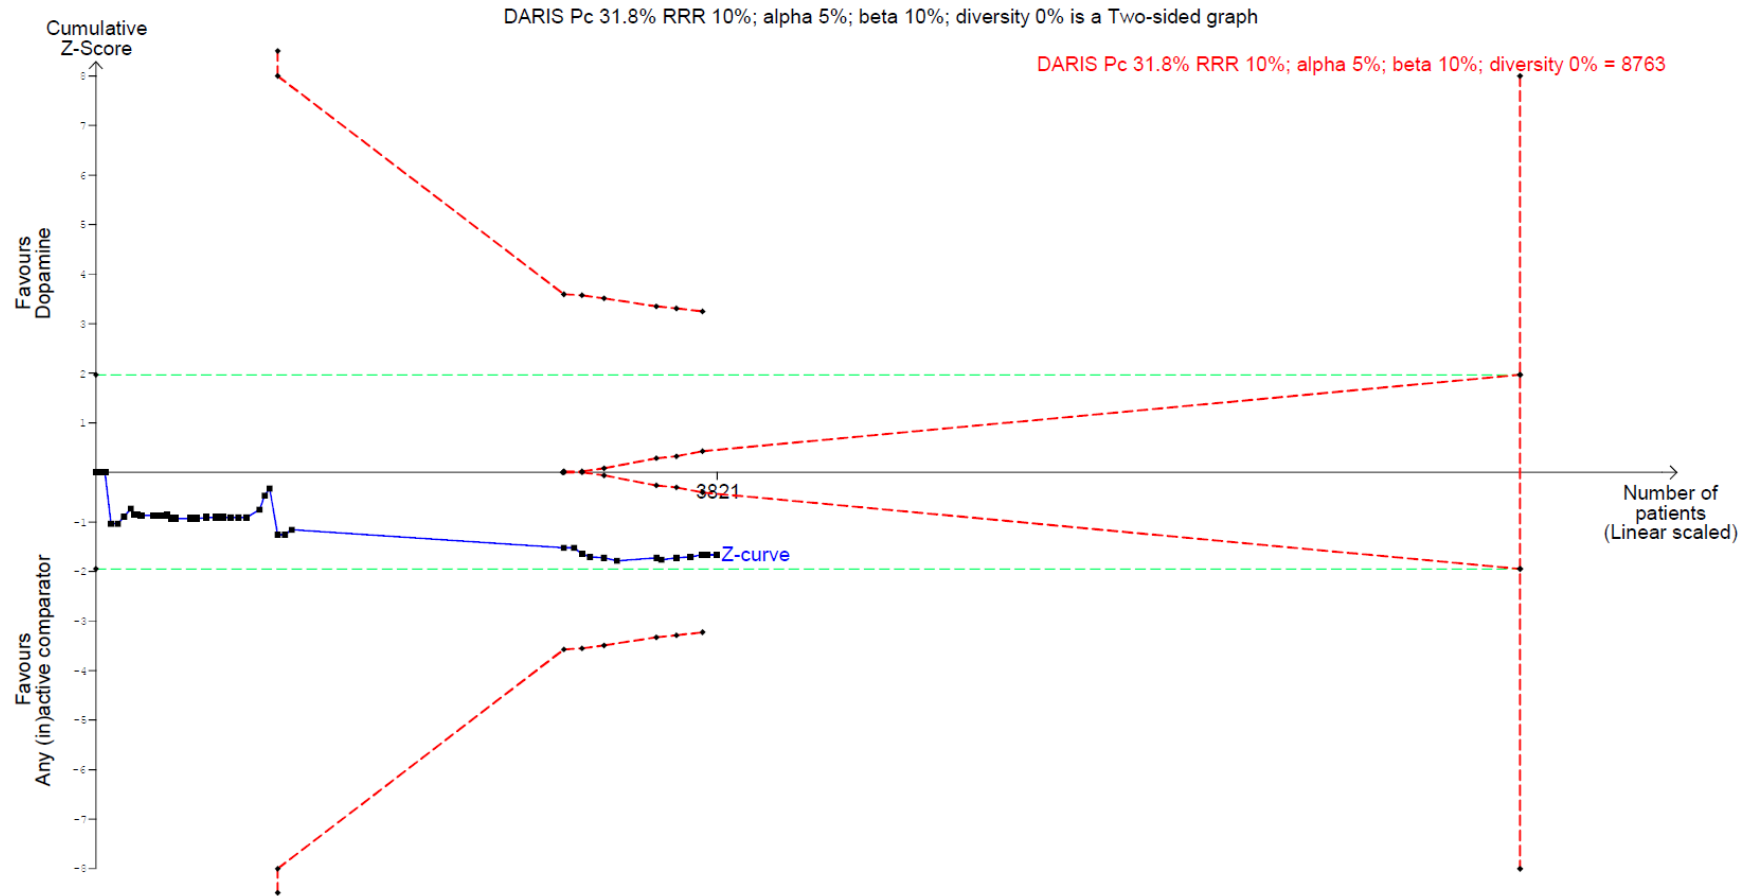

Figure legend. A diversity-adjusted required information size (RIS) of 8,763 patients was calculated using the predefined  $\alpha = 0.05$  (two-sided),  $\beta = 0.10$  (power 90%),  $D^2 = 0\%$ , an anticipated relative risk reduction of 10% and an event proportion of 31.8% in the control arm. The *blue cumulative z-curve* was constructed using a random effects model. The *horizontal green dotted lines* represent the conventional boundary's for benefit (positive) or harm (negative). The *horizontal red dotted lines* represent the trial sequential boundary's for benefit (positive), harm (negative) or futility (middle triangular area).

**Figure S5a: Manhattan matrix plot with beneficial outcomes**

**Outcomes with benefit of dopamine versus any comparator in critically ill patients with cardiac dysfunction**

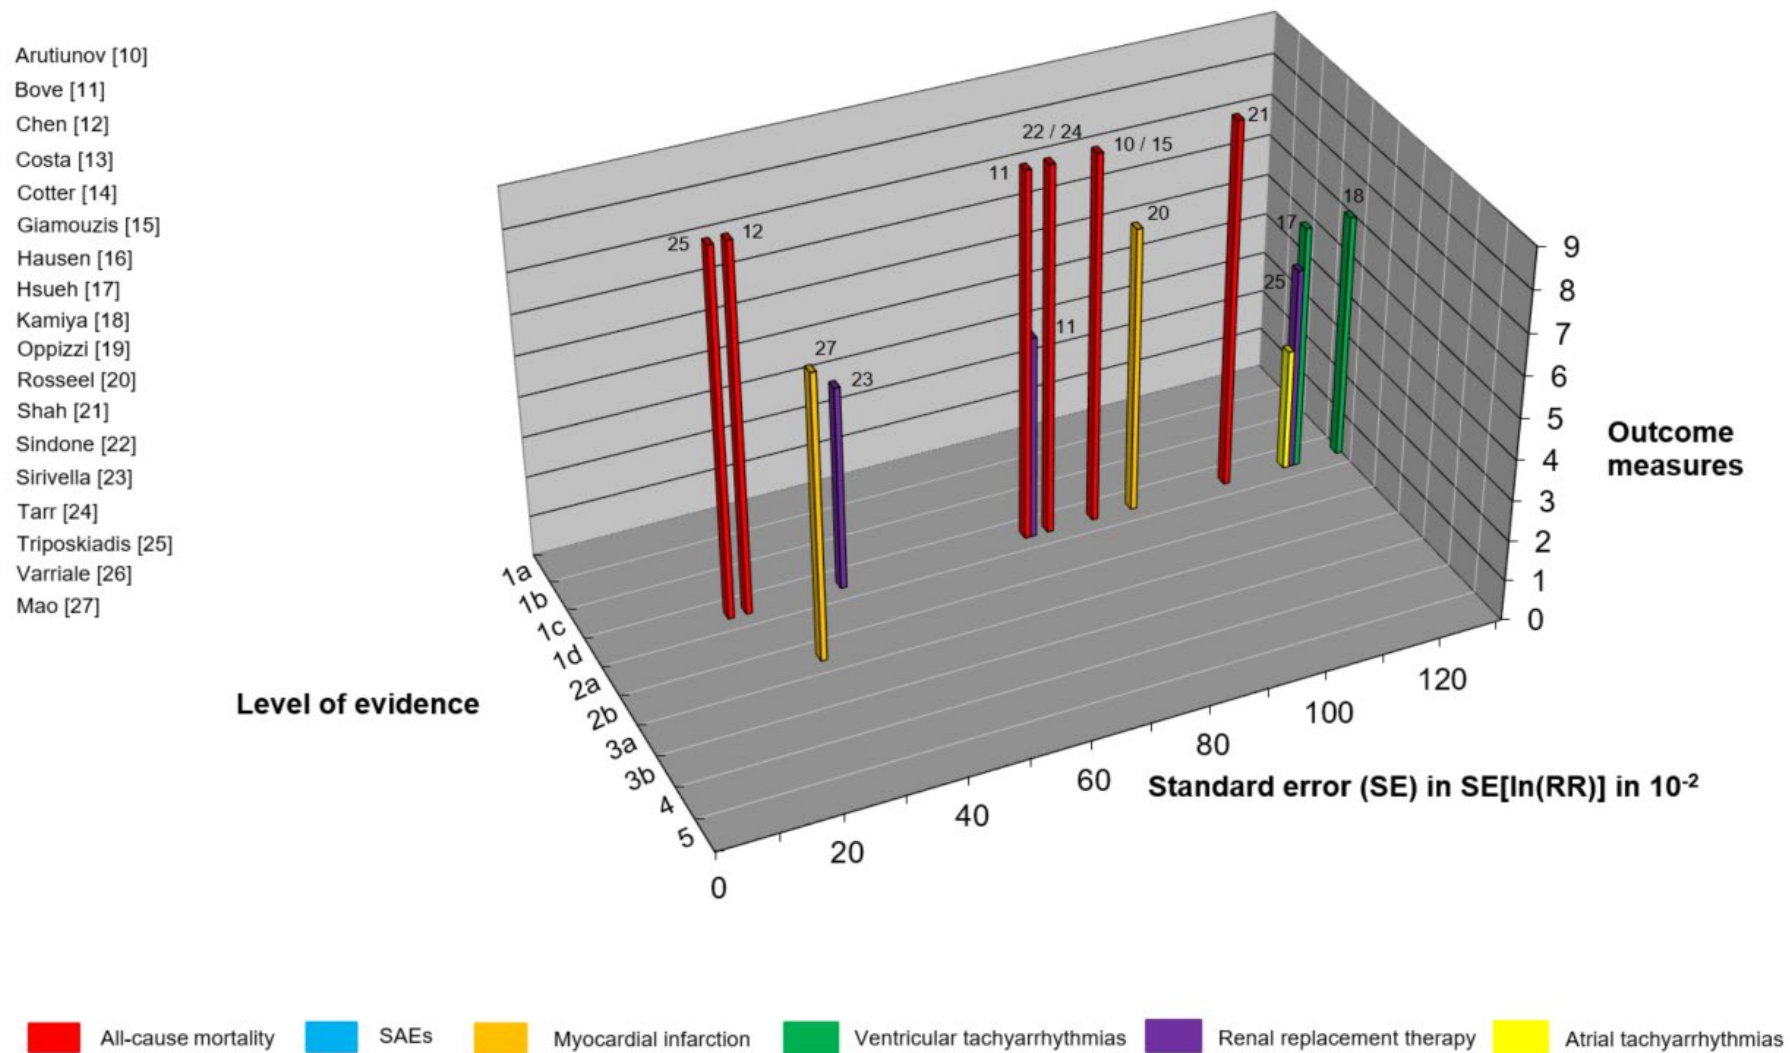

**Figure S5b: Manhattan matrix plot with harmful outcomes**

**Outcomes with harm of of dopamine versus any comparator in critically ill patients with cardiac dysfunction**

- Arutiunov [10]
- Bove [11]
- Chen [12]
- Costa [13]
- Cotter [14]
- Giamouzis [15]
- Hausen [16]
- Hsueh [17]
- Kamiya [18]
- Oppizzi [19]
- Rosseel [20]
- Shah [21]
- Sindone [22]
- Sirivella [23]
- Tarr [24]
- Triposkiadis [25]
- Varriale [26]
- Mao [27]

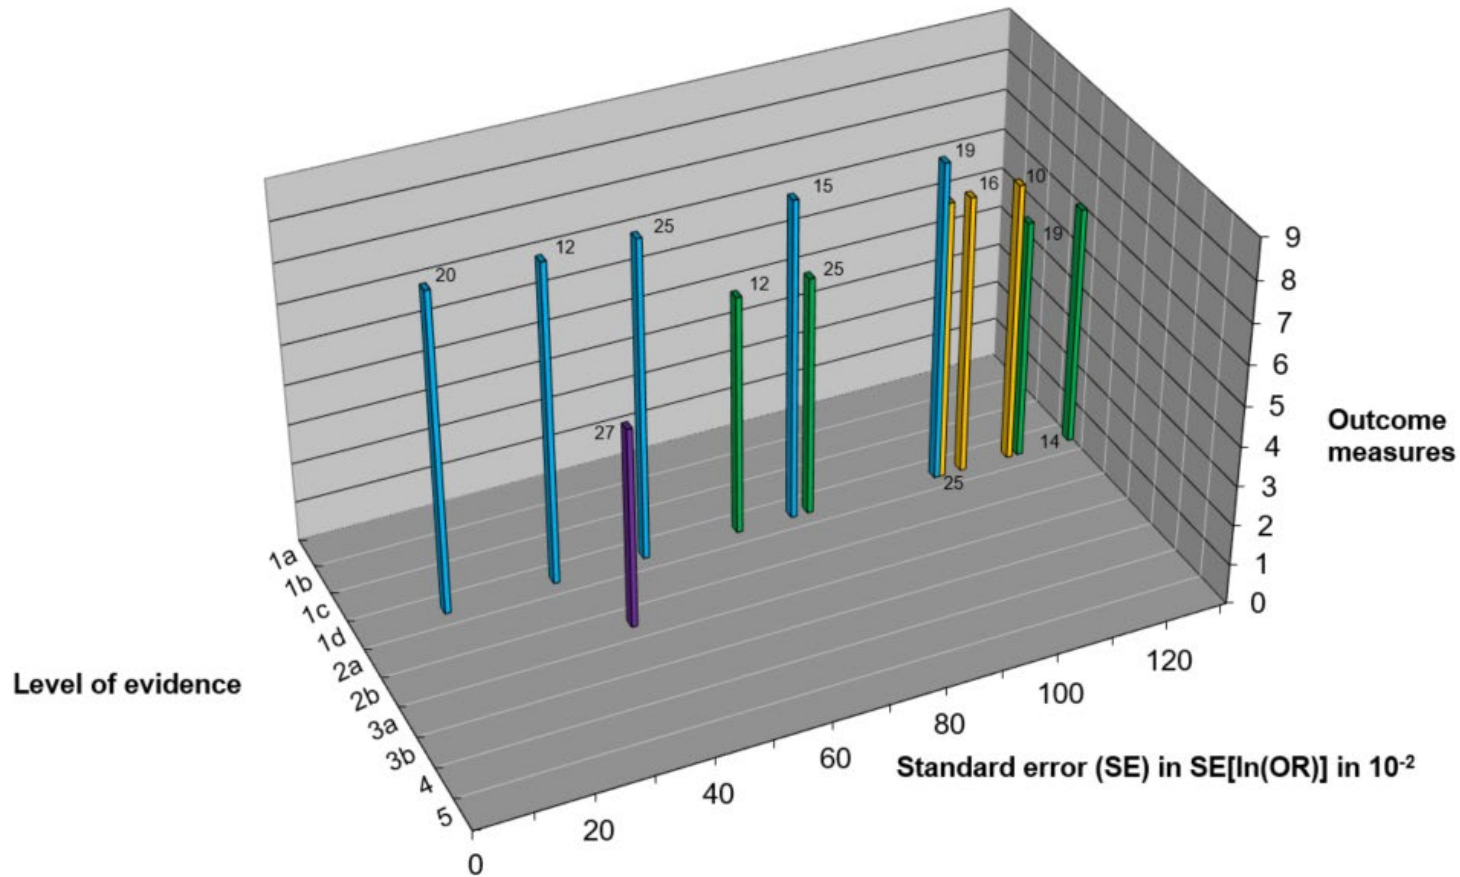

- All-cause mortality
- SAEs
- Myocardial infarction
- Ventricular tachyarrhythmias
- Renal replacement therapy

**Figure S6: Funnel plots for small trial bias including publication bias**

*Figure S6a: Mortality at maximum follow-up*

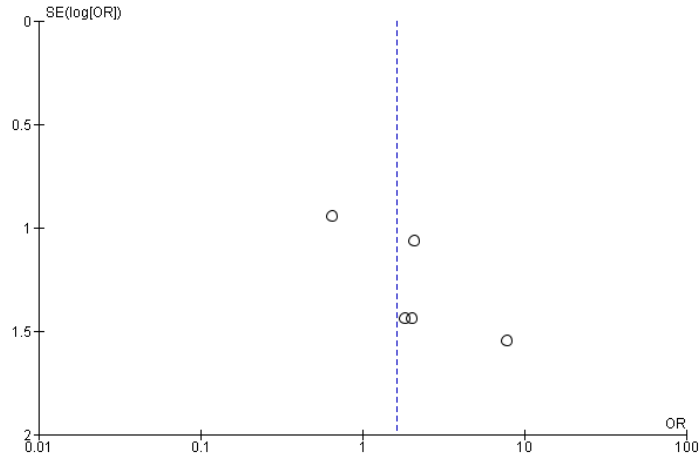

*Figure S6b: Serious adverse events*

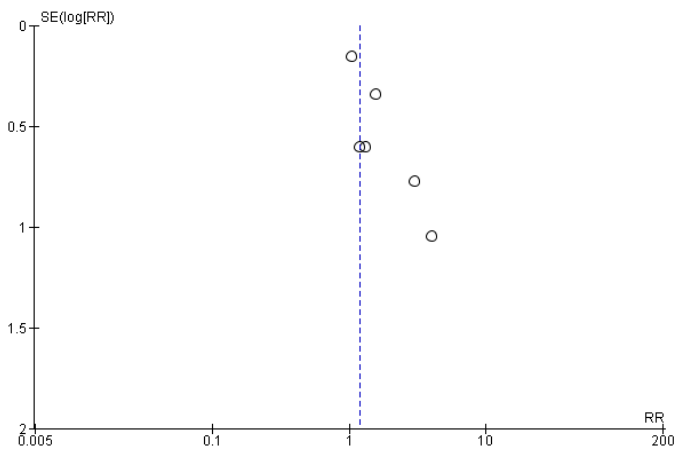

*Figure S6c: Myocardial infarction*

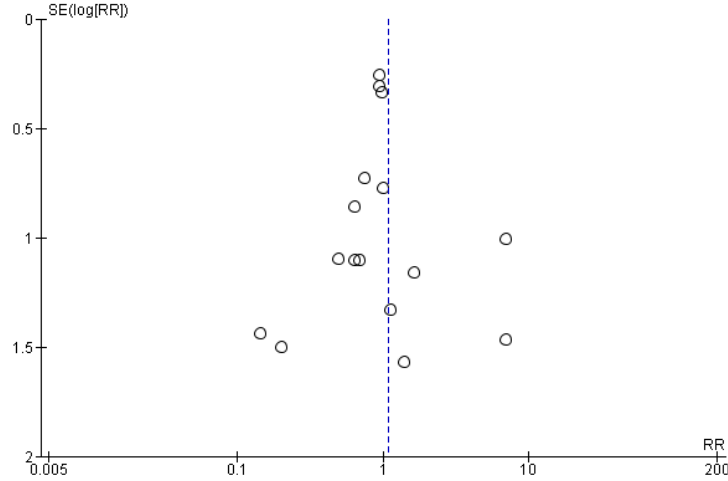

*Figure S6d: ventricular tachyarrhythmias*

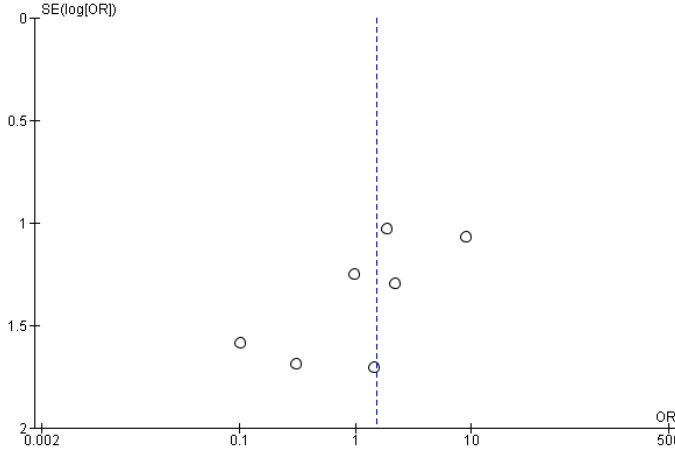

Figure S6e: Renal replacement therapy

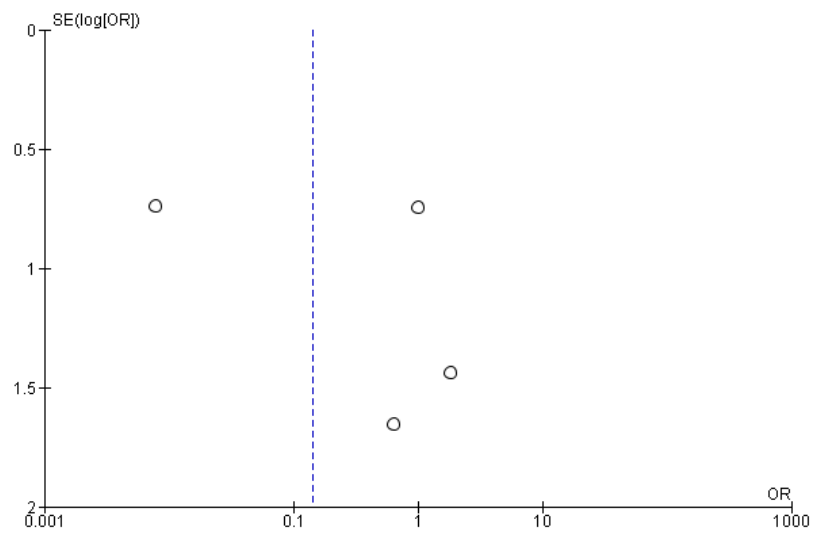

Figure S6f: atrial tachyarrhythmias

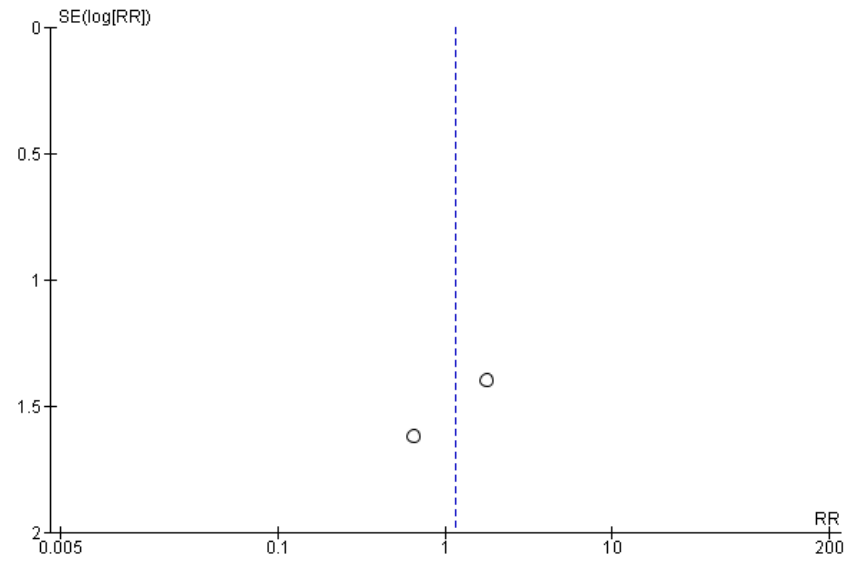



## References

1. Kamiya M, Sato N, Nozaki A, Akiya M, Okazaki H, Takahashi Y, et al. Renal effects of added low-dose dopamine in acute heart failure patients with diuretic resistance to natriuretic peptide. *J Cardiovasc Pharmacol* 2015 March 01;65(3):282-288.
2. Shah RA, Subban V, Lakshmanan A, Narayanan S, Udhayakumaran K, Pakshirajan B, et al. A prospective, randomized study to evaluate the efficacy of various diuretic strategies in acute decompensated heart failure. *Indian Heart J* 2014 June 01;66(3):309-316.
3. Triposkiadis FK, Butler J, Karayannis G, Starling RC, Filippatos G, Wolski K, et al. Efficacy and safety of high dose versus low dose furosemide with or without dopamine infusion: the Dopamine in Acute Decompensated Heart Failure II (DAD-HF II) trial. *Int J Cardiol* 2014 Mar 1;172(1):115-121.
4. Chen HH, Anstrom KJ, Givertz MM, Stevenson LW, Semigran MJ, Goldsmith SR, et al. Low-dose dopamine or low-dose nesiritide in acute heart failure with renal dysfunction: the ROSE acute heart failure randomized trial. *JAMA* 2013 Dec 18;310(23):2533-2543.
5. Giamouzis G, Butler J, Starling RC, Karayannis G, Nastas J, Parisi C, et al. Impact of dopamine infusion on renal function in hospitalized heart failure patients: results of the Dopamine in Acute Decompensated Heart Failure (DAD-HF) Trial. *J Card Fail* 2010 Dec;16(12):922-930.
6. Arutiunov GP, Arutiunov AG, Volkova AL. Study evaluating the impact of a combination of inotropic support and heart rate control on prognosis and stabilization rate in patients with decompensated chronic heart failure (LEGION). *Ter Arkh* 2010;82(3):47-52.
7. Hsueh CW, Lee WL, Chen CK, Ho HY, Chen CP, Huang JL, et al. Dopamine and dobutamine have different effects on heart rate variability in patients with congestive heart failure. *Zhonghua Yi Xue Za Zhi (Taipei)* 1998 April 01;61(4):199-209.
8. Sindone A, MacDonald, P, K, A. Haemodynamic, neurohumoral and symptomatic effects of dobutamine, dopamine and milrinone in severe heart failure. *Aust N Z J Med* 1998;28:113.
9. Cotter G, Weissgarten J, Metzko E, Moshkovitz Y, Litinski I, Tavori U, et al. Increased toxicity of high-dose furosemide versus low-dose dopamine in the treatment of refractory congestive heart failure. *Clin Pharmacol Ther* 1997 August 01;62(2):187-193.
10. Varriale P, Mossavi A. The benefit of low-dose dopamine during vigorous diuresis for congestive heart failure associated with renal insufficiency: does it protect renal function? *Clin Cardiol* 1997 July 01;20(7):627-630.
11. Oppizzi M, Montorsi E, Tosoni A, Casati V, Venturino M, Franco A, et al. The effectiveness of enoximone in patients with serious left ventricular dysfunction submitted for aorto-coronary bypass. *Minerva Anestesiol* 1997 February 01;63(1-2):17-27.
12. Costa P, Ottino GM, Matani A, Pansini S, Canavese C, Passerini G, et al. Low-dose dopamine during cardiopulmonary bypass in patients with renal dysfunction. *J Cardiothorac Anesth* 1990 August 01;4(4):469-473.
13. Bove T, Landoni G, Calabro MG, Aletti G, Marino G, Cerchierini E, et al. Renoprotective action of fenoldopam in high-risk patients undergoing cardiac surgery: a prospective, double-blind, randomized clinical trial. *Circulation* 2005 June 21;111(24):3230-3235.

14. Sirivella S, Gielchinsky I, Parsonnet V. Mannitol, furosemide, and dopamine infusion in postoperative renal failure complicating cardiac surgery. *Ann Thorac Surg* 2000 February 01;69(2):501-506.
15. Rosseel PM, Santman FW, Bouter H, Dott CS. Postcardiac surgery low cardiac output syndrome: dopexamine or dopamine? *Intensive Care Med* 1997 September 01;23(9):962-968.
16. Tarr TJ, Moore NA, Frazer RS, Shearer ES, Desmond MJ. Haemodynamic effects and comparison of enoximone, dobutamine and dopamine following mitral valve surgery. *Eur J Anaesthesiol Suppl* 1993;8:15-24.
17. Hausen B, Heublein B, Vogelpohl J, von der Leyen H, Haverich A. Comparison of enoximone and piroximone in patients after mitral valve operation: a prospective and controlled clinical study. *J Cardiovasc Pharmacol* 1992 March 01;19(3):299-307.
